# Supplementary material for: Three-Dimensional Zn0.5Cd0.5S/Reduced Graphene Oxide Hybrid Aerogel: Facile Synthesis and the Visible-Light-Driven Photocatalytic Property for Reduction of Cr(VI) in Water
Source: Hindawi journal article supplement (doi:10.1155/2016/6201546), 2016-01-01
Supplement: f1 [file 6201546.f1.pdf]

**Three-Dimensional  $\text{Zn}_{0.5}\text{Cd}_{0.5}\text{S}$ /Reduced Graphene Oxide Hybrid Aerogel: Facile Synthesis and the Visible-Light-Driven Photocatalytic Property for Reduction of Cr(VI) in Water**

Wei Xiao\*, Wenjie Zhou, Yanhua Zhang\*, Liangliang Tian, Hongdong Liu, Yong Pu

*Research Institute for New Materials Technology, Chongqing University of Arts and Sciences, Yongchuan Chongqing 402160, China*

\* Corresponding author 1: W. Xiao (E-mail address: showame@aliyun.com)

\* Corresponding author 2: Y. Zhang (E-mail address: zyhcoco@163.com)

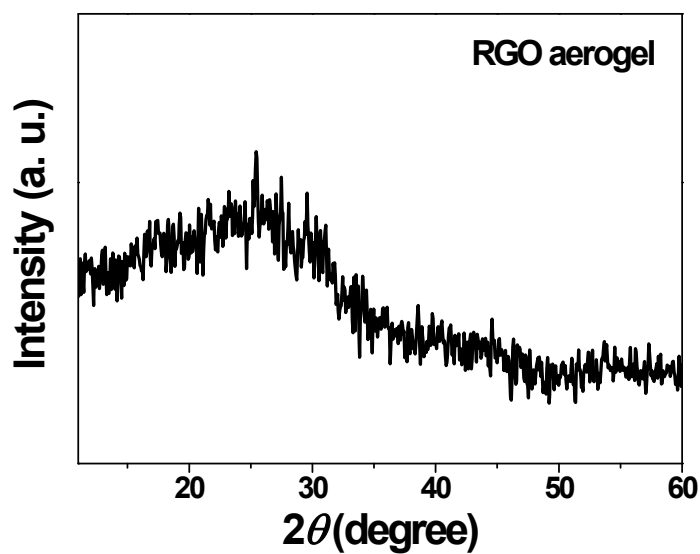

**Figure S1.** XRD pattern of RGO aerogel, showing a characteristic broad peak at  $2\theta = 25^\circ$ .

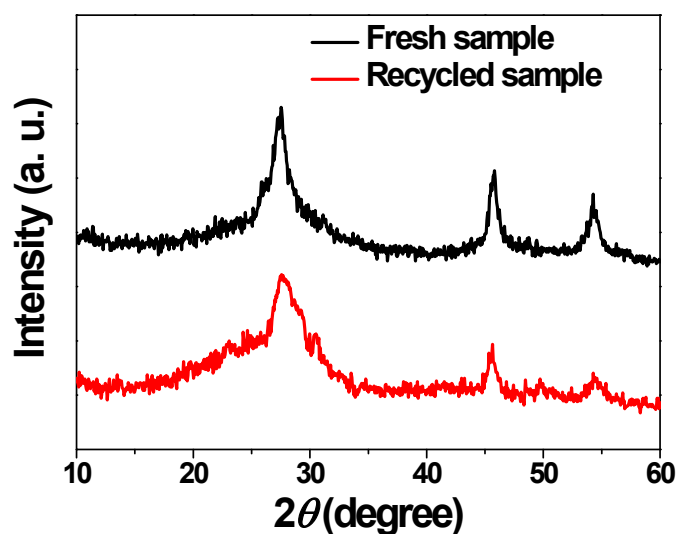

**Figure S2.** XRD patterns of fresh  $\text{Zn}_{0.5}\text{Cd}_{0.5}\text{S}/\text{RGO}$  hybrid aerogel (black curve) and recycled  $\text{Zn}_{0.5}\text{Cd}_{0.5}\text{S}/\text{RGO}$  hybrid aerogel material (red curve), which was consecutively used for visible-light-driven photocatalytic reduction of  $\text{Cr}(\text{VI})$  for five cycles.

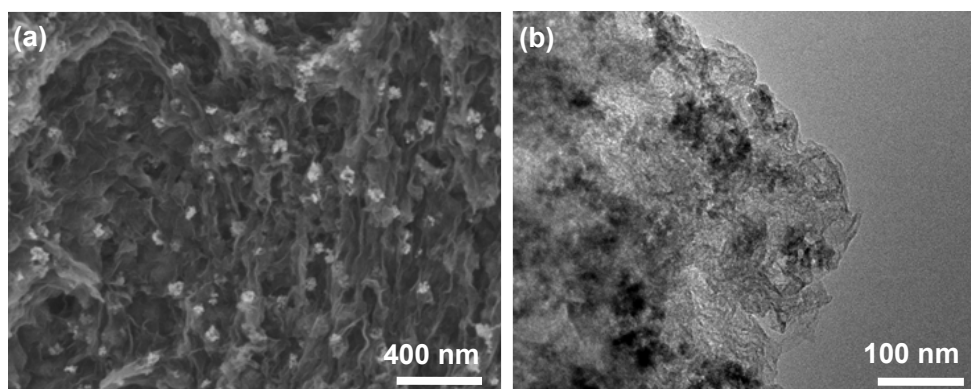

**Figure S3.** (a) SEM and (b) TEM images of  $\text{Zn}_{0.5}\text{Cd}_{0.5}\text{S}/\text{RGO}$  hybrid aerogel material after being consecutively used for visible-light-driven photocatalytic reduction of  $\text{Cr}(\text{VI})$  for five times. The recycled  $\text{Zn}_{0.5}\text{Cd}_{0.5}\text{S}/\text{RGO}$  hybrid aerogel material retained its initial hierarchically porous architecture with  $\text{Zn}_{0.5}\text{Cd}_{0.5}\text{S}$  solid solution uniformly distributed within the RGO backbone, demonstrating the satisfactory durability and robustness.
